# Supplementary material
Source: HighWire-hosted journal article supplement (https://www.cmajopen.ca/highwire/filestream/88207/field_highwire_adjunct_files/0/open-2021-0219-1-at.pdf)
Supplement: open-2021-0219-1-at.pdf [file open-2021-0219-1-at.pdf]

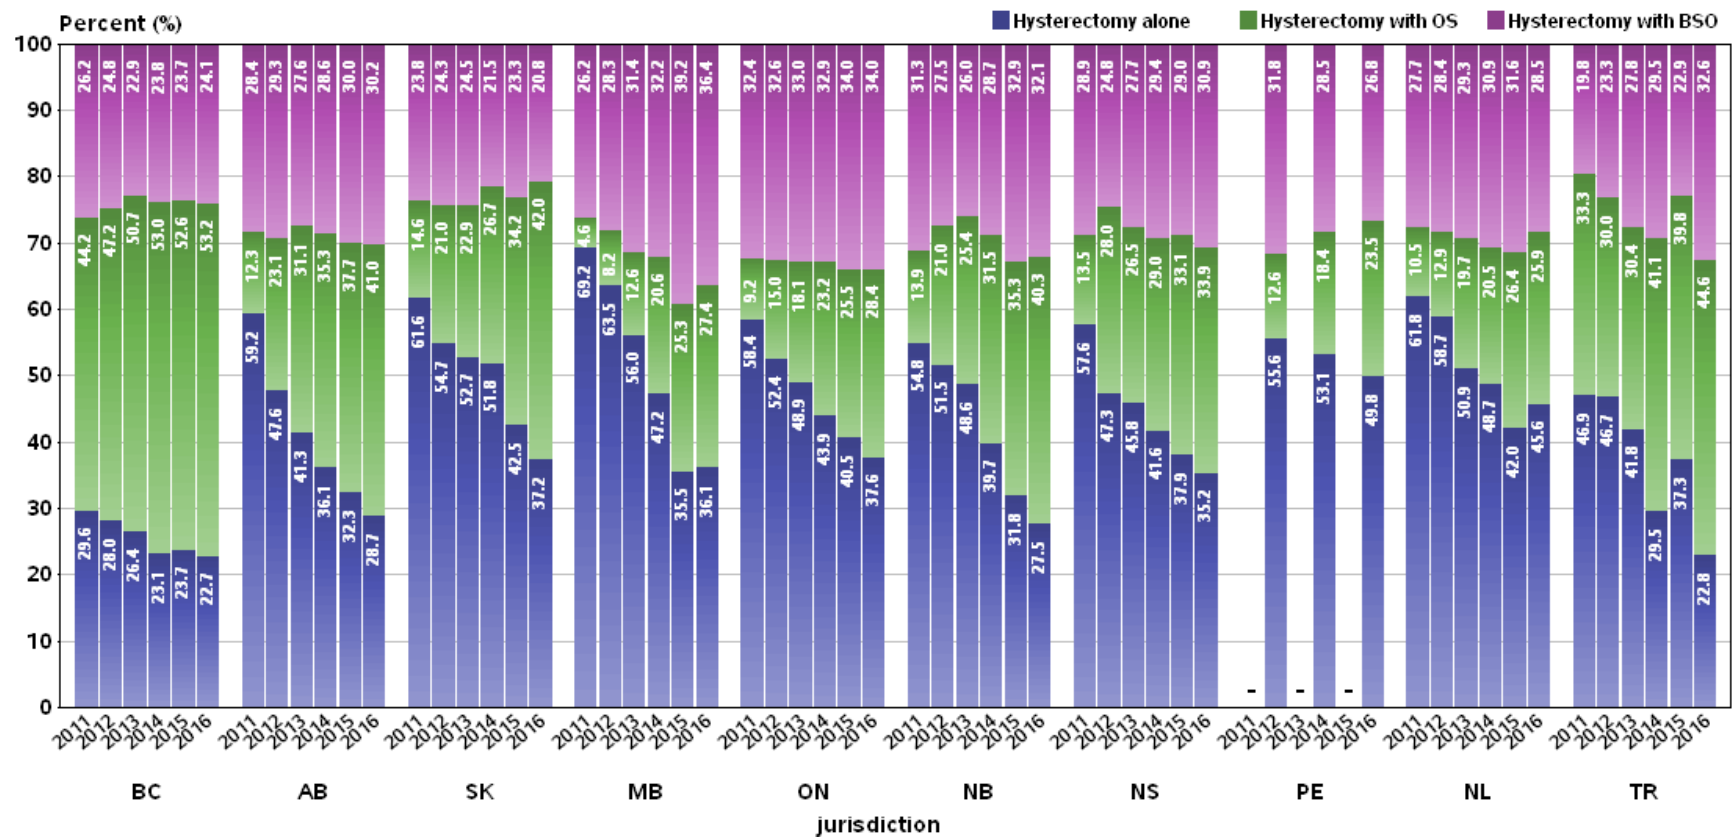

Appendix Figure 1a. Proportion of hysterectomies between 2011 and 2016 according to concomitant procedures by Canadian province or territory (except Quebec).

Proportion of people who underwent hysterectomy alone, hysterectomy with opportunistic salpingectomy and hysterectomy with bilateral salpingo-oophorectomy.

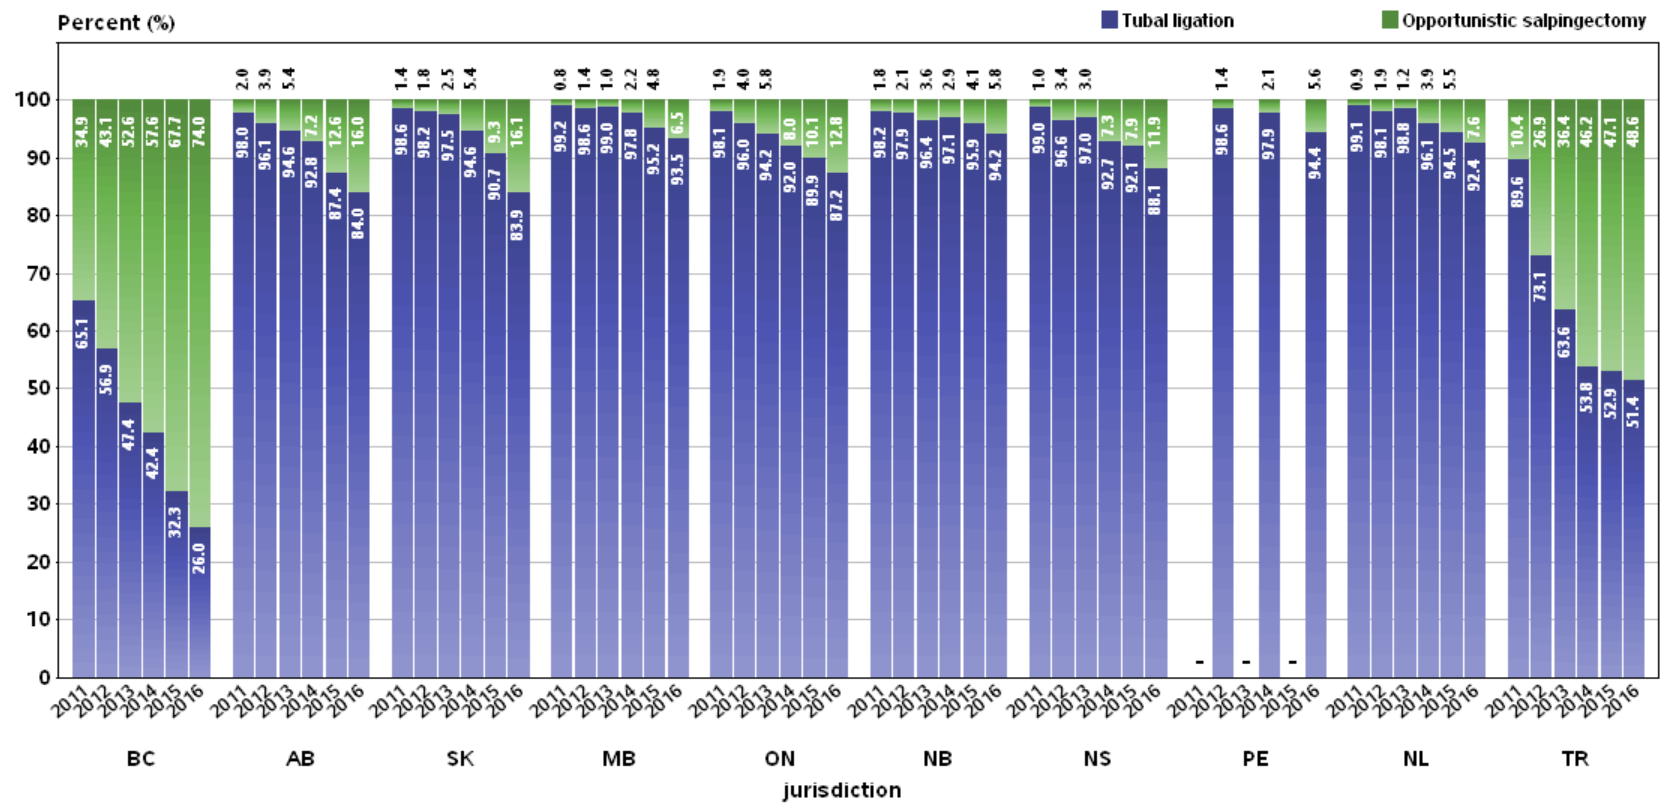

Appendix Figure 1b. Proportion of tubal sterilizations that were done by OS and by tubal ligation between 2011 and 2016 by Canadian province or territory (except Quebec).

Proportion of people who underwent tubal ligation for sterilization, and opportunistic salpingectomy for sterilization.

Appendix Table 1: Diagnostic codes used for exclusion and in descriptive table

| ICD 10 codes used for exclusion  |                                                                      |
|----------------------------------|----------------------------------------------------------------------|
| ICD-10 code                      | Explanation                                                          |
| C53.X                            | Malignant neoplasm of the cervix uteri                               |
| C54.X                            | Malignant neoplasm of the corpus uteri                               |
| C55.X                            | Malignant neoplasm of the uterus, part unspecified                   |
| C56.X                            | Malignant neoplasm of the ovary                                      |
| C57.X                            | Malignant neoplasm of other and unspecified female genital organs    |
|                                  |                                                                      |
| ICD-10 codes included in table 1 |                                                                      |
| N80.X                            | Endometriosis                                                        |
| D25.X                            | Uterine leiomyoma                                                    |
| D26.X                            | Other benign neoplasm of the uterus                                  |
| D27.X                            | Benign neoplasm of the ovary                                         |
| D28.7                            | Benign neoplasm of other specified female genital organs             |
| N92.X                            | Excessive, frequent and irregular menstruation                       |
| N93.X                            | Other abnormal uterine and vaginal bleeding                          |
| N81.X                            | Female genital prolapse                                              |
| N73.X                            | Other female pelvic inflammatory diseases                            |
| N74.X                            | Female pelvic inflammatory disorder in diseases classified elsewhere |
| N70.X                            | Salpingitis and oophoritis                                           |
| E28.X                            | Ovarian dysfunction                                                  |
| Z30.2                            | Sterilization                                                        |
| R10.2                            | Pelvic and perineal pain                                             |
| R10.3                            | Pain localized to other parts of lower abdomen                       |

Appendix Table 2: Diagnostic codes listed with surgical hospital stay for age group 15-24 between 2011 and 2016 in Canada (except Quebec)

| Diseases                                                 | Hysterectomy alone<br>(N=196) | Hysterectomy with OS<br>(N=109) | Hysterectomy with BSO<br>(N=271) | Tubal ligation<br>(N=4,681) | Opportunistic salpingectomy<br>(N=305) |
|----------------------------------------------------------|-------------------------------|---------------------------------|----------------------------------|-----------------------------|----------------------------------------|
| Endometriosis (N80)                                      | 41<br>(20.9%)                 | 22<br>(20.2%)                   | 17<br>(6.3%)                     | 60<br>(1.3%)                | 9<br>(3.0%)                            |
| Uterine leiomyoma (D25)                                  | 9<br>(4.6%)                   | *                               | *                                | *                           | 0<br>(0%)                              |
| Benign uterine or ovarian neoplasm (D26, D27, D28.7)     | 9<br>(4.6%)                   | 0<br>(0%)                       | *                                | 10<br>(0.2%)                | *                                      |
| Abnormal bleeding (N92, N93)                             | 75<br>(38.3%)                 | 50<br>(45.9%)                   | 22<br>(8.1%)                     | 77<br>(1.6%)                | *                                      |
| Pelvic organ prolapse (N81)                              | 7<br>(3.6%)                   | *                               | *                                | 5<br>(0.1%)                 | 0<br>(0%)                              |
| Pelvic inflammatory Disease (N73, N74)                   | 8<br>(4.1%)                   | *                               | 8<br>(3.0%)                      | 78<br>(1.7%)                | 11<br>(3.6%)                           |
| Hydrosalpinx (N70)                                       | *                             | *                               | *                                | 5<br>(0.1%)                 | 10<br>(3.3%)                           |
| Polycystic ovary Syndrome (E28)                          | *                             | 0<br>(0%)                       | 8<br>(3%)                        | *                           | 0<br>(0%)                              |
| Sterilization (Z30.2)                                    | 5<br>(2.6%)                   | 5<br>(4.6%)                     | *                                | 4449<br>(95%)               | 271<br>(88.9%)                         |
| Pelvic, perineal and lower abdominal pain (R10.2, R10.3) | 31<br>(15.8%)                 | 18<br>(16.5%)                   | 17<br>(6.3%)                     | 34<br>(0.7%)                | 8<br>(2.6%)                            |
| Gender identity Disorders (F64)                          | *                             | 11<br>(10.1%)                   | 172<br>(63.5%)                   | 0                           | 0                                      |
| Procedures other than remedying health state (Z41)       | 5<br>(2.6%)                   | 9<br>(8.3%)                     | 179<br>(66.1%)                   | 0                           | *                                      |

\*: Suppressed owing to small numbers (<5) and residual disclosure.
